# Supplementary material
Source: Springer Nature journal article supplement (https://www.springermedizin.de/resource/supplementary/13102_2010_40_MOESM3_ESM.pdf/9667602)

A. Sham-operated ACL

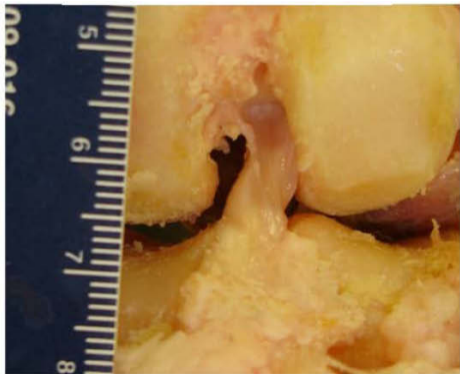

B. ECM-treated healing ACL

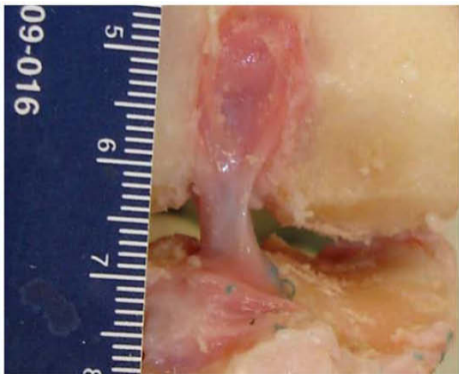

Supplement: MOESM3 [file 9667602]
